# Supplementary material
Source: Springer Nature journal article supplement (https://www.springermedizin.de/resource/supplementary/12911_2009_304_MOESM7_ESM.pdf/9525492)

<<subsystem>>  
Combined Reasoner

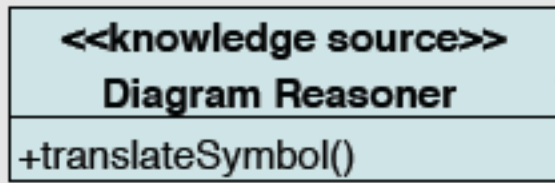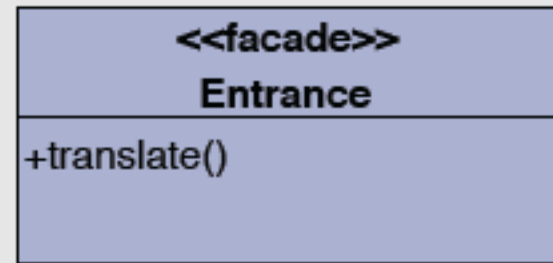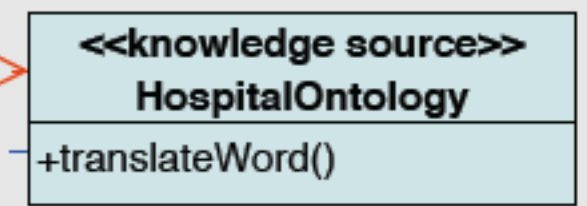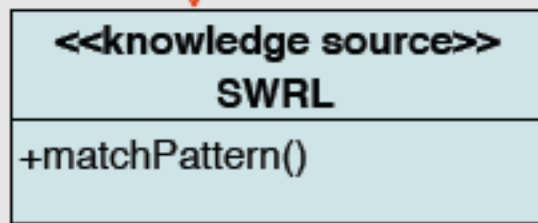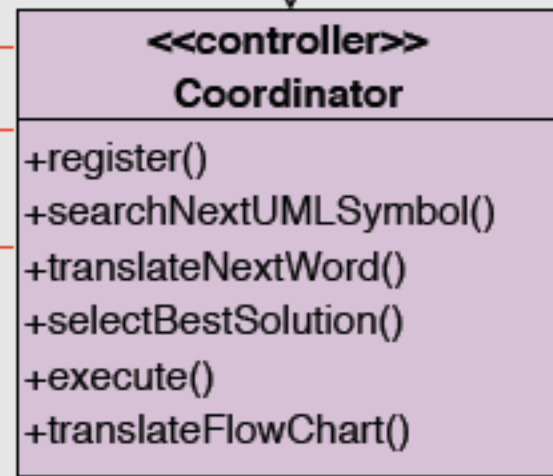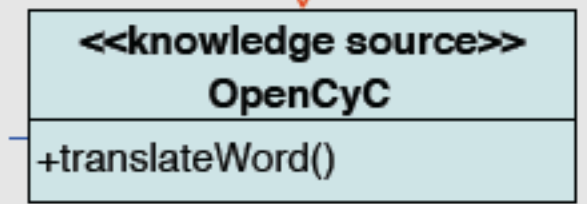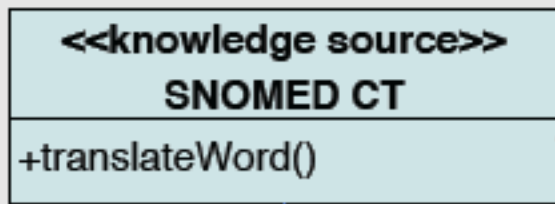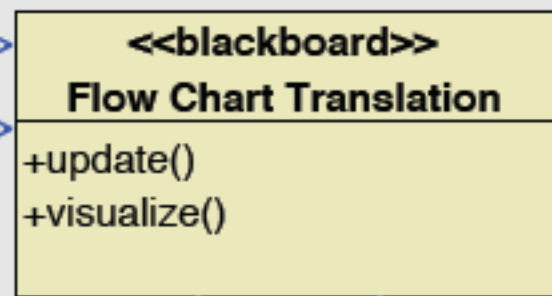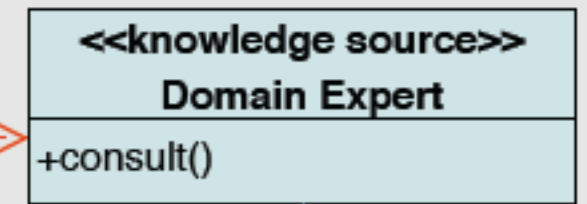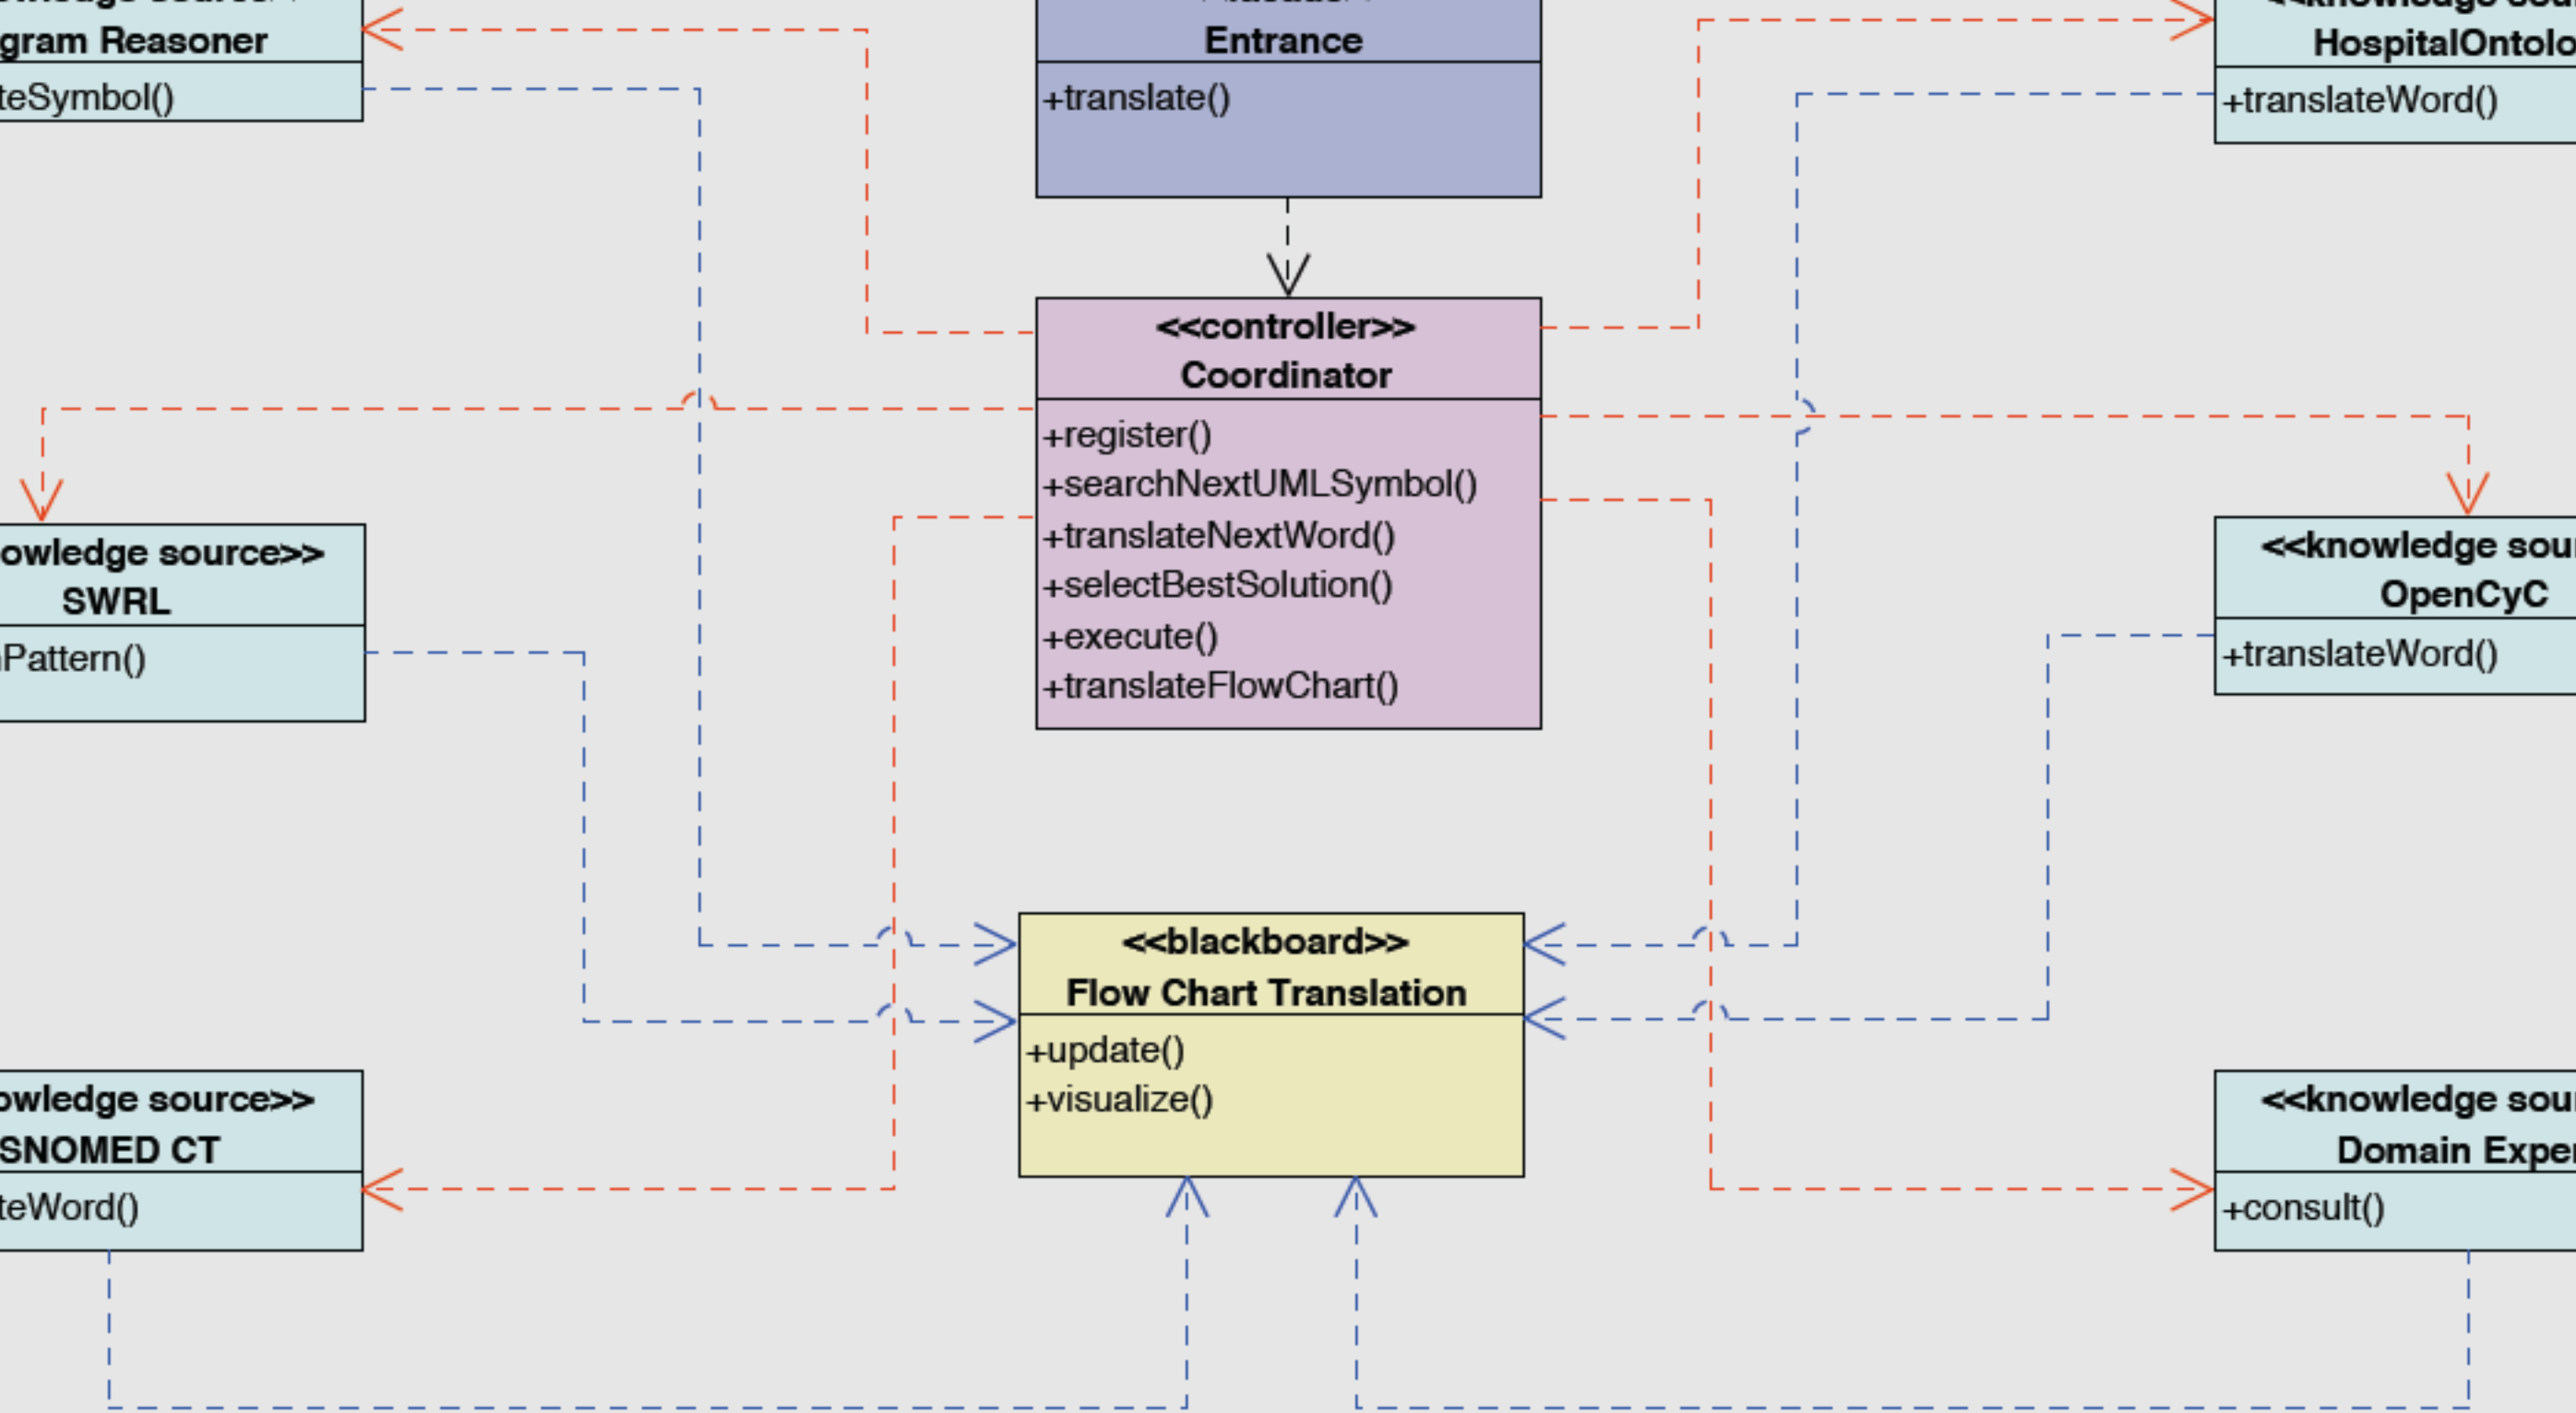

Supplement: MOESM7 [file 9525492]
